# Supplementary material for: User Perspectives of Characteristics of Improved Cookstoves from a Field Evaluation in Western Kenya
Source: MDPI journal article supplement (doi:10.3390/ijerph13020167), 2016-01-27
Supplement: s1 [file s1]

# Supplementary Materials: User Perspectives of Characteristics of Improved Cookstoves from a Field Evaluation in Western Kenya

Jennifer D. Loo, Lirije Hyseni, Rosebel Ouda, Selline Koske, Ronald Nyagol, Ibrahim Sadumah, Michelle Bashin, Mike Sage, Nigel Bruce, Tamara Pilishvili and Debbi Stanistreet

Table S1. Description of stoves selected for the study.

| Stove Image                                                                         | Stove Name | Design                         | Combustion Chamber | Model Number | Manufacturer                                      |
|-------------------------------------------------------------------------------------|------------|--------------------------------|--------------------|--------------|---------------------------------------------------|
|    | Eco Chula  | Electric fan-assisted gasifier | Ceramic            | XXL          | Alpha Renewable Energy Pvt. Ltd. Atlanta, GA, USA |
|   | EcoZoom    | Improved rocket                | Ceramic            | Dura         | EcoZoom, OR, USA                                  |
|  | Envirofit  | Improved rocket                | Metal alloy        | G3300        | Envirofit International Fort Collins, CO, USA     |

Table S1. Cont.

| Stove Image                                                                         | Stove Name         | Design                                       | Combustion Chamber | Model Number | Manufacturer                                                      |
|-------------------------------------------------------------------------------------|--------------------|----------------------------------------------|--------------------|--------------|-------------------------------------------------------------------|
|    | Philips            | Electric fan-assisted gasifier               | Ceramic            | ACE (HD4012) | Philips African Clean Energy, Maseru, Lesotho, South Africa       |
|    | Prakti             | Double pot rocket with chimney               | Steel alloy        | Leo          | Prakti Pondicherry, India                                         |
|   | RTI TECA           | Built-in mud rocket with thermal-powered fan | Brick/clay         | Kenyan Upesi | Local artisans RTI International, Research Triangle Park, NC, USA |
|  | 3 stone fire (TCS) | Stones                                       | None               | —            | —                                                                 |

**Table S2.** Themes and codes.

|                                                                                                                                                                                                                                                                                                                                                                                                                                                                                                                                                                 |
|-----------------------------------------------------------------------------------------------------------------------------------------------------------------------------------------------------------------------------------------------------------------------------------------------------------------------------------------------------------------------------------------------------------------------------------------------------------------------------------------------------------------------------------------------------------------|
| <b>Stove Characteristics:</b> general preferences; fuel opening; versatility; efficiency; fit to kitchen; cleanliness; cooking speed; comfort; durability; ease of use, heat adjustment, ease of lighting, pot stability; knowledge of alternative stoves, fuels, experience of other stoves; local food preparation; multiple stove use; general concerns; appearance; patterns of use; placing; potential improvements; safety; smoke; stove maintenance; stove supervision, constant supervision, retaining a flame; taste of food; size combustion chamber; |
| <b>Fuel issues:</b> biomass availability; biomass collection; biomass quality; biomass quantity; ease of use; size of biomass; multiple fuel use, charcoal, kerosene                                                                                                                                                                                                                                                                                                                                                                                            |
| <b>Health:</b> child health; smoke, intensity/regularity, perceived hazards, burns, symptoms (description); smoke; maternal health, smoke, intensity/regularity, perceived hazards, burns, symptoms (description)                                                                                                                                                                                                                                                                                                                                               |

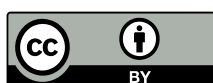

© 2016 by the authors; licensee MDPI, Basel, Switzerland. This article is an open access article distributed under the terms and conditions of the Creative Commons by Attribution (CC-BY) license (<http://creativecommons.org/licenses/by/4.0/>).
